# Supplementary material for: Accumulation of the Vitamin D Precursor Cholecalciferol Antagonizes Hedgehog Signaling to Impair Hemogenic Endothelium Formation
Source: PubMed Central journal article supplement — Stem Cell Reports. 2015 Sep 10;5(4):471–9. doi: 10.1016/j.stemcr.2015.08.010 (PMC4624955; doi:10.1016/j.stemcr.2015.08.010), 2015-09-10
Supplement: mmc1.pdf [file mmc1.pdf]

**Stem Cell Reports, Volume 5**

**Supplemental Information**

**Accumulation of the Vitamin D Precursor  
Cholecalciferol Antagonizes Hedgehog Signaling  
to Impair Hemogenic Endothelium Formation**

**Mauricio Cortes, Sarah Y. Liu, Wanda Kwan, Kristen Alexa, Wolfram Goessling, and  
Trista E. North**

Supplemental Figure 1.

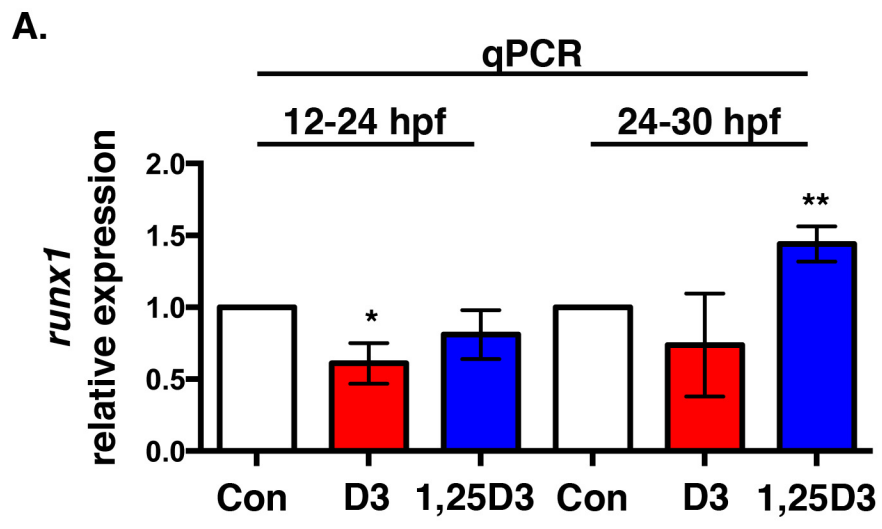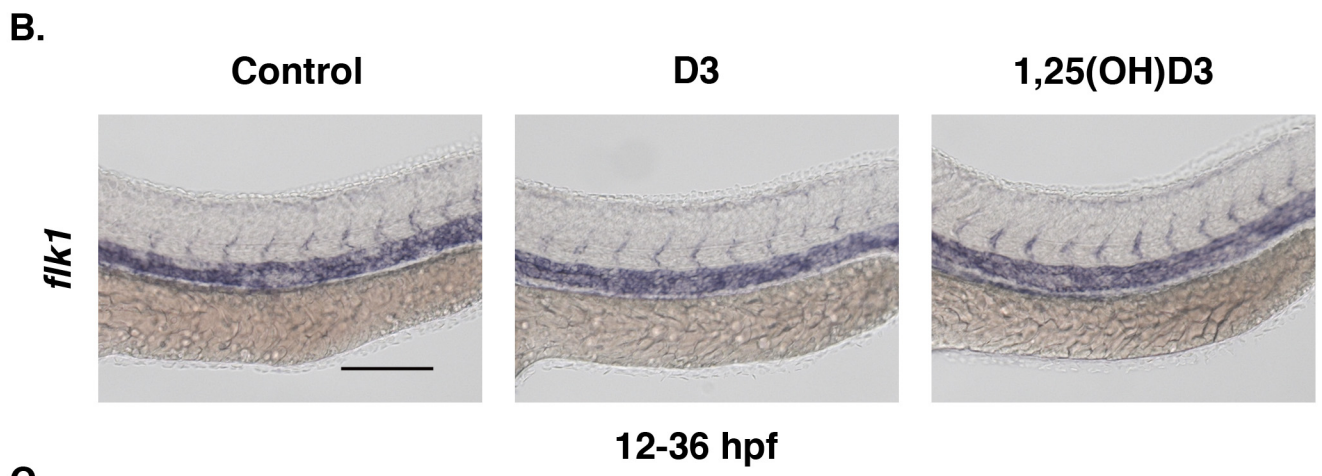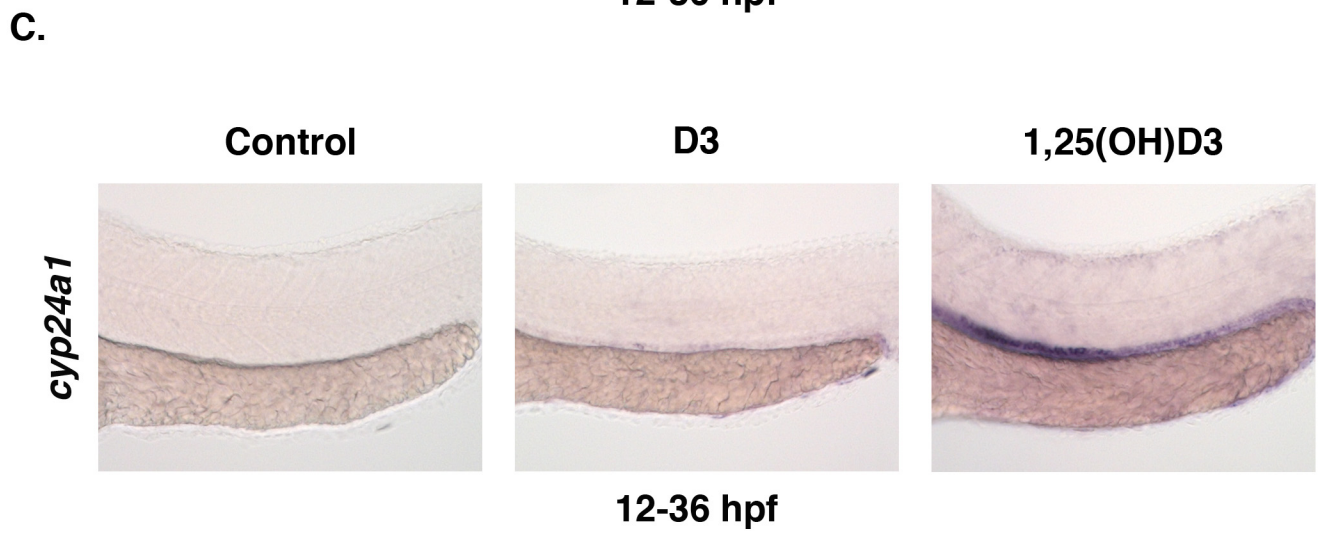

**Figure S1. Vitamin D3 intermediates differentially affect HSPC expression and VDR activation (related to Figure 1)**

A. qPCR analysis confirmed D3 significantly decreased *runx1* expression only when treatment occurred during hemogenic niche formation (12-24hpf) (\*p=0.014); in contrast, 1,25(OH)D3 increased *runx1* expression (24-30hpf: \*\*p=0.003) (40 pooled embryos/condition x 3 replicates).

B. WISH for *flk1* indicated normal vasculature in embryos treated with either D3 or 1,25(OH)D3 from 12-36hpf (n>25 embryos/condition); scale bar =100µm.

C. Embryos treated with 1,25(OH)D3 showed differential regulation of the known VDR transcriptional target *cyp24a1* compared with those exposed to D3 from 12-36hpf (n>20 embryos/condition); scale as S1B.

Supplemental Figure 2.

A.

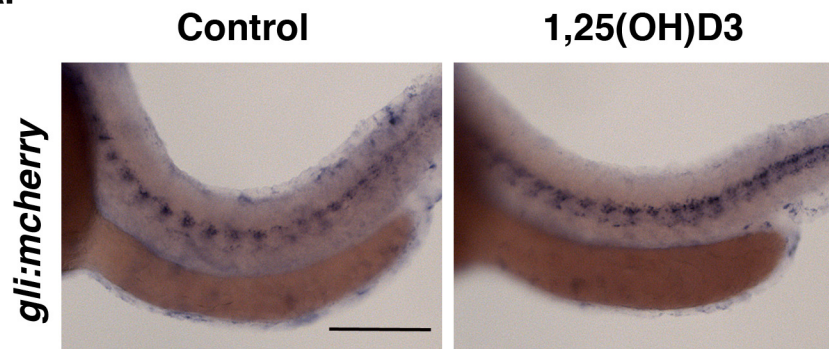

B.

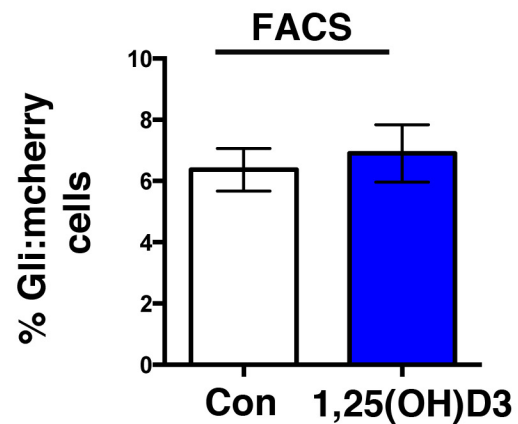

C.

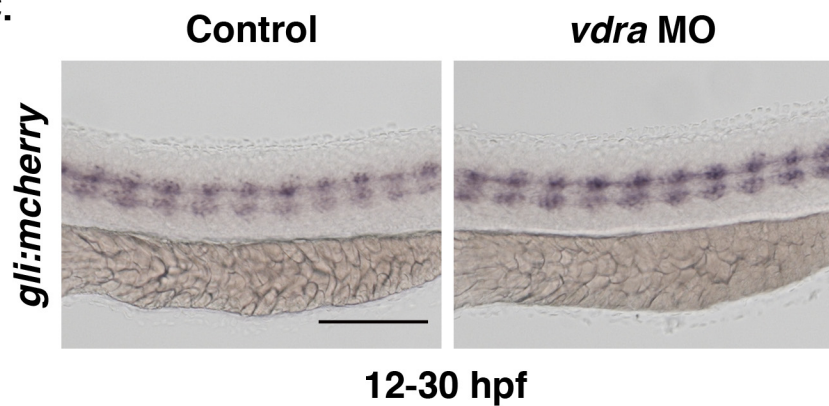

D.

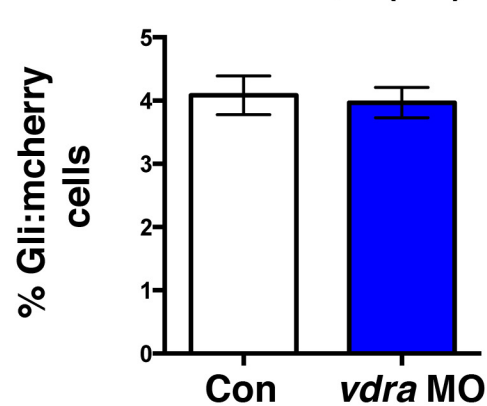

E.

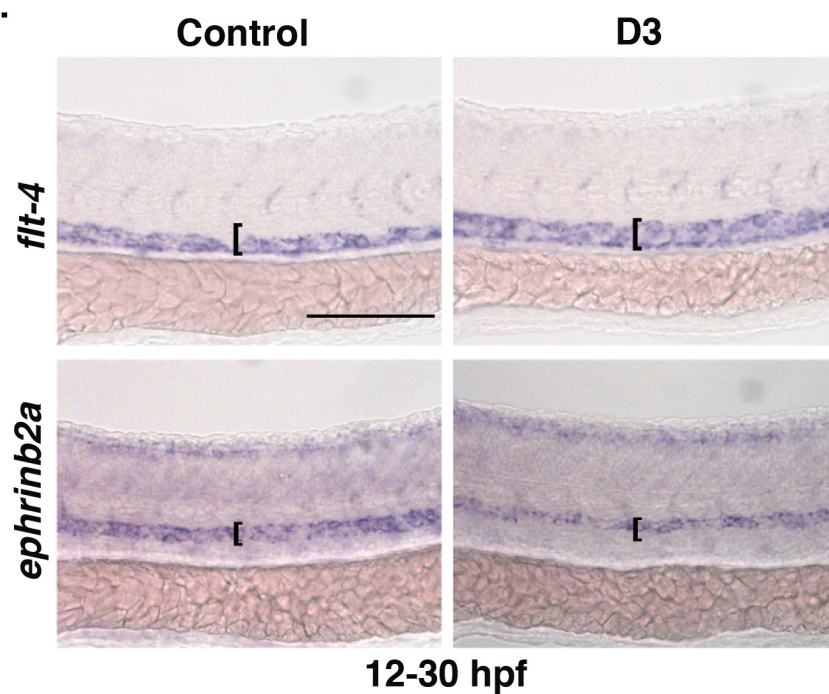

F.

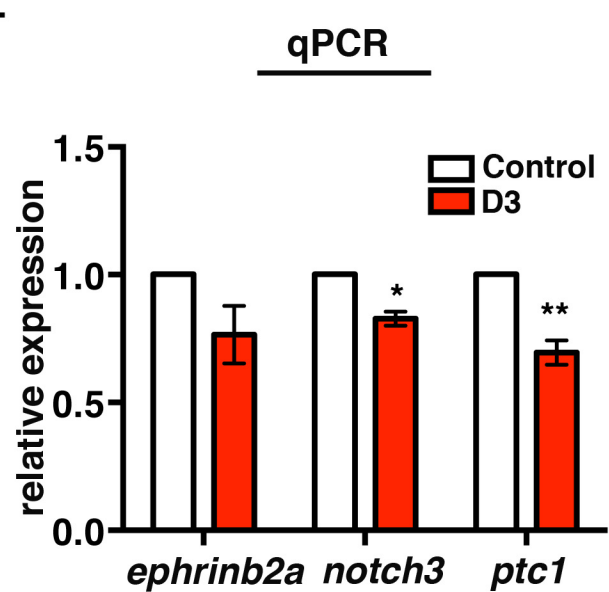

G.

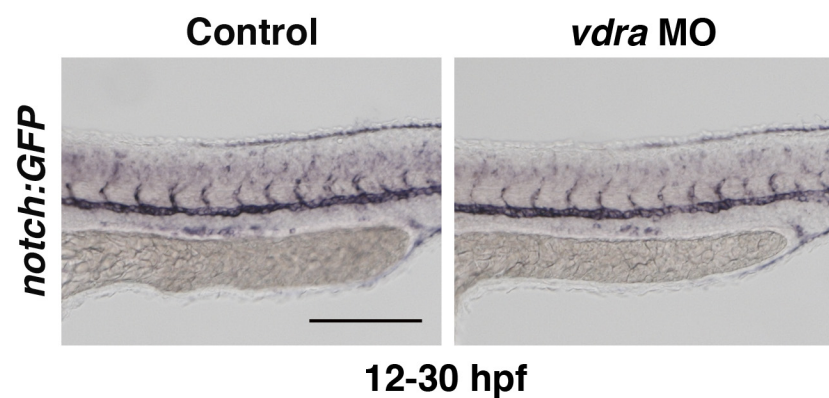

H.

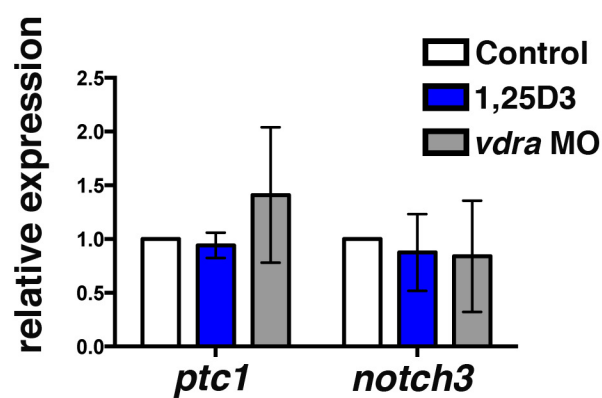

**Figure S2. D3, but not 1,25(OH)D3, negatively impacts Hedgehog activity and vascular specification (related to Figure 2)**

A. WISH analysis of Gli:mCherry embryos showed no significant decrease in Hh activity with 1,25(OH)D3 treatment (n>20 embryos/condition); scale bar =200µm.

B. FACS quantification confirmed the Gli:mCherry expression was unaltered by 1,25(OH)D3 (p=0.396) (5 embryos per sample x 4 replicates/condition).

C. WISH analysis of Gli:mCherry embryos showed no significant impact on Hh activity with *vdra* knockdown (n>20 embryos/condition); scale bar =100µm.

D. FACS quantification confirmed that Gli:mCherry expression was unaltered in *vdra* morphants (p=0.53) (n-value as in S2B).

E. Embryos treated with D3 (12-30hpf) showed expansion (black brackets) of the venous marker *flt-4* (upper panels) and reduced/restricted expression of the arterial marker *ephrinb2a* (lower panels) (n>20 embryos/condition); scale bar =100µm.

F. qPCR analysis of D3-treated embryos confirmed reduced expression of arterial markers *ephrinb2a* and *notch3* (one-tailed t-test, \*p=0.012), along with the hedgehog marker *ptc1* (one-tailed t-test, \*\*p=0.013) (40 pooled embryos/condition x 3 replicates).

G. Notch-reporter embryos showed no impact on Notch activity by *vdra* knockdown as determined by WISH for *GFP* expression (n>20 embryos/condition); scale bar =100µm.

H. qPCR analysis of 1,25(OH)D3-treated or *vdra* morphant embryos confirmed that neither *ptc1* (one-tailed t-test, p=0.32) nor *notch3* (one-tailed t-test, p=0.62) were impacted by VDR modulation (n-value as in S2F).

Supplemental Figure 3.

A.

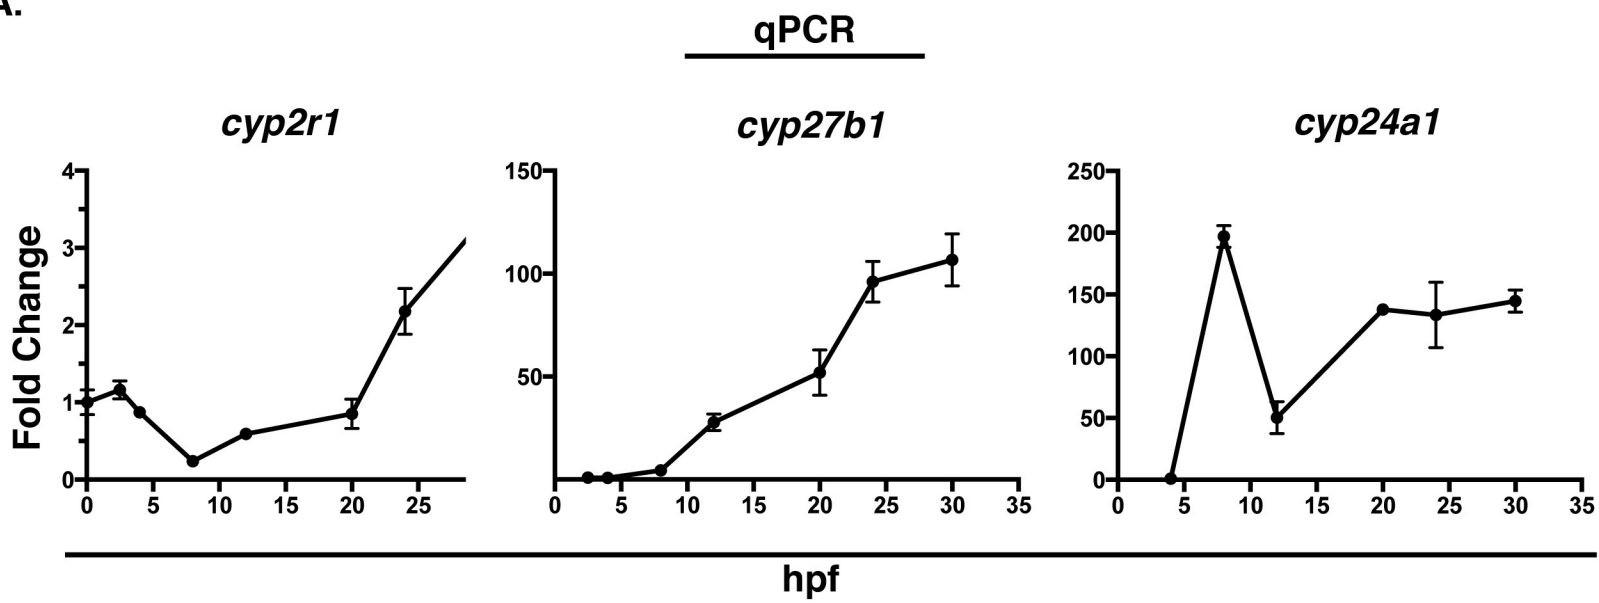

B.

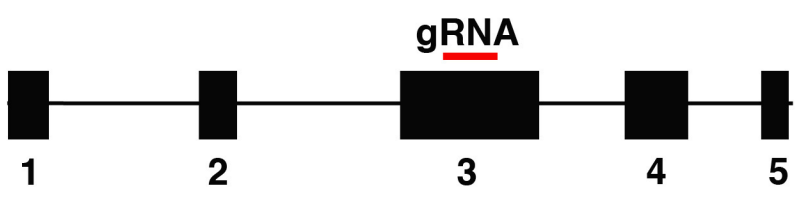

*cyp2r1* mutant alleles

EagI

365 AGTTTGTGGTGCCTCAATCCAGCCT**CGGCCG**TATTTGCAGT 404 WT  
 365 AGTTTGTGG-----TGCAGT 379 Δ25  
 365 AGTTTGTGGTGCCTCAATCCAGCCTCGGC-----AGT 395 Δ9

C.

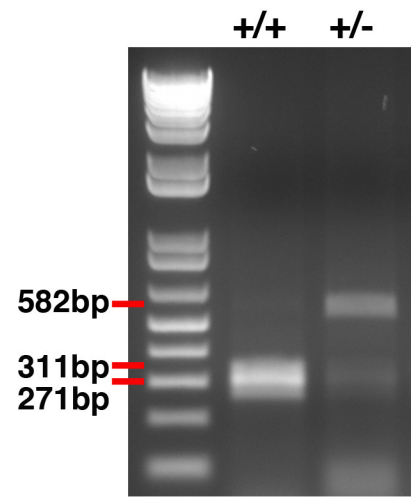

D.

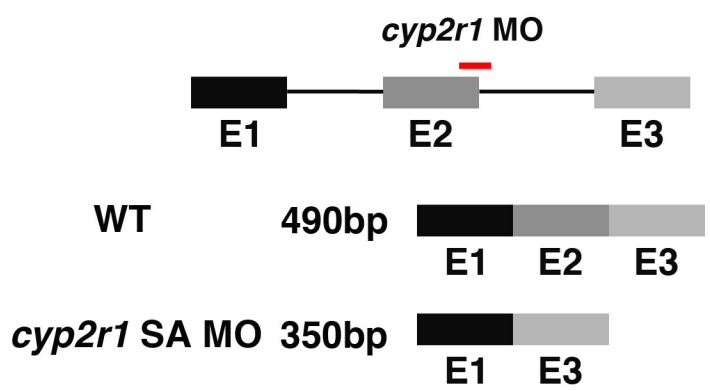

E.

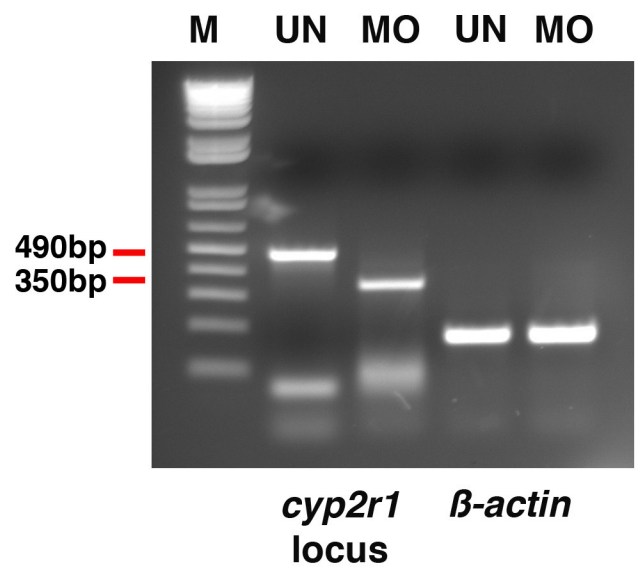

**Figure S3. Targeting D3 hydroxylation via *cyp2r1* mutation and knockdown (related to Figure 4)**

A. qPCR analysis indicated expression of *cyp2r1*, *cyp27b1*, and *cyp24a1* was upregulated by 24hpf, at the onset of circulation and definitive hematopoiesis (40 pooled embryos/condition x 3 replicates).

B. Schematic representation of the CRISPR/cas9-mediated targeted deletions in *cyp2r1*.

C. Gel electrophoresis of depicting loss of EagI restriction site in *cyp2r1* heterozygote mutant compared to WT control sibling.

D. Schematic representation *cyp2r1*-MO targeting site and predicted spliced product.

E. Confirmation of MO-mediated knockdown of *cyp2r1* by efficient splicing of exon-3, as determined by PCR amplification of *cyp2r1* loci in control and MO-injected embryos.

Supplemental Figure 4.

A.

Control

*cyp2r1* MO

*notch:GFP*

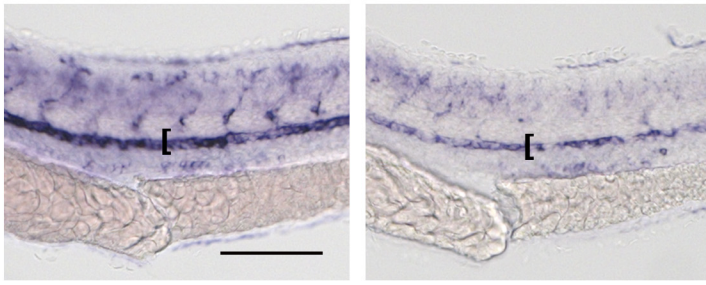

30 hpf

B.

*notch:GFP*

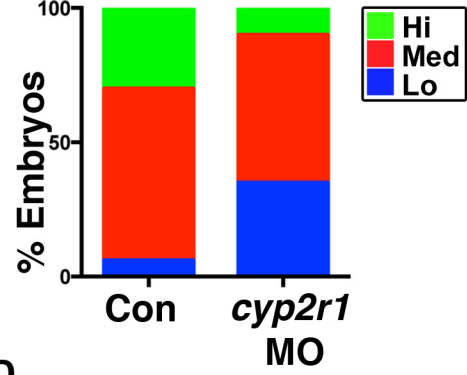

C.

Control

*cyp2r1* MO

*flt-4*

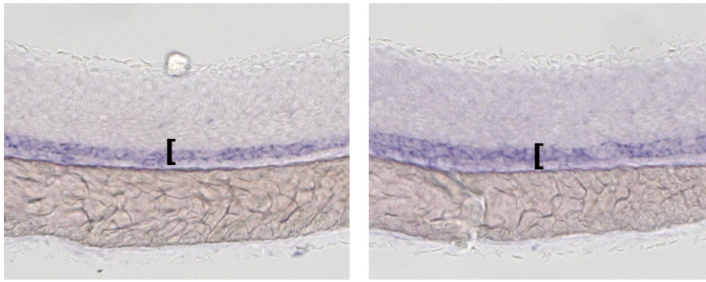

30 hpf

D.

Control

*cyp2r1* MO

*ephrinb2a*

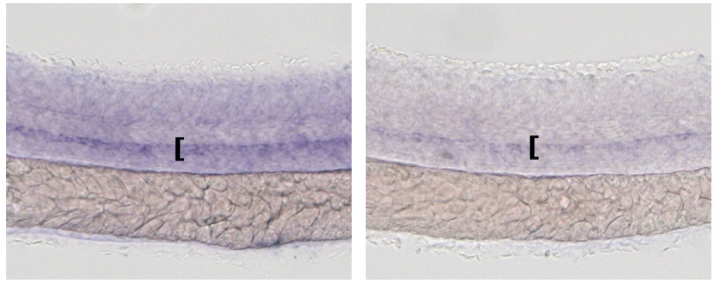

30 hpf

E.

Control

*cyp27b1* MO

*gli:mcherry*

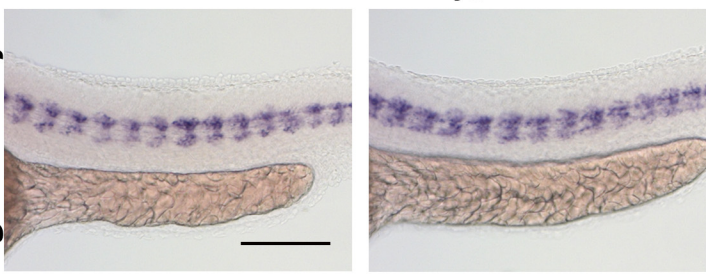

30 hpf

F.

*gli:mcherry*

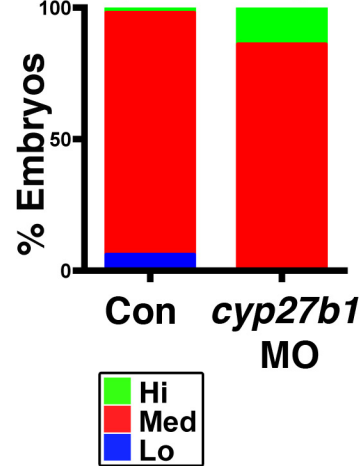

G.

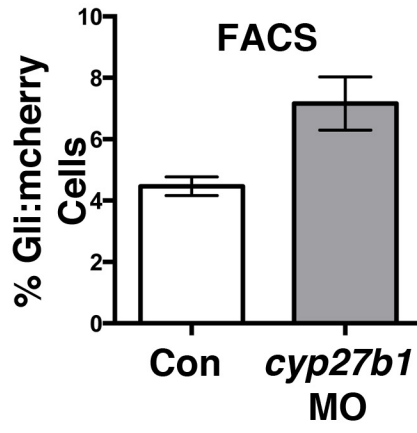



**Figure S4. Reduction in *cyp2r1* function impairs Hh-mediated specification of the vascular niche (related to Figure 4)**

A. *cyp2r1* morphants had reduced Notch-reporter activity in the AGM as determined by WISH; scale bar =100µm.

B. Qualitative phenotypic distribution of embryos from panel S4A scored for high, medium, and low Notch activity (n>35 embryos/condition).

C. *cyp2r1* morphants exhibited expanded *flt-4* (black brackets) expression at 30hpf (n>20embryos/condition); scale as S4A.

D. *ephrinb2a* expression was reduced in *cyp2r1* morphants (n>20 embryos/condition); scale as S4A.

E. Morpholino knockdown of *cyp27b1* showed no significant impact on Gli-reporter activity by WISH; scale bar =200µm.

F. Qualitative phenotypic distribution of embryos from panel S4E scored for high, medium, and low Gli-reporter expression (n>35 embryos/condition).

G. Gli-reporter FACS analysis in *cyp27b1* morphants shows no alteration in Hh activity (5 embryos per sample x 4 replicates/condition).

## SUPPLEMENTAL EXPERIMENTAL PROCEDURES

**Table S1. Quantitative RT-PCR Primers**

| <b>Gene</b>     | <b>Forward</b>         | <b>Reverse</b>         |
|-----------------|------------------------|------------------------|
| <i>18s</i>      | TCGCTAGTTGGCATCGTTTAT  | CGGAGGTTCGAAGACGATCA   |
| <i>runx1</i>    | CGTCTTCACAAACCCTCCTCAA | GCTTTACTGCTTCATCCGGCT  |
| <i>ephrinB2</i> | CAAGGACAGCAAATCGAATG   | TGAGCCAATGACTGATGAGG   |
| <i>notch3</i>   | GCATTGACCGACCTAATGGA   | TGCTCTCACACAGTCTTCCTTC |
| <i>ptch2</i>    | TGACTATGCCCGTTCTCAAAG  | CATCAAAAGTGGCTTGCAGAC  |
| <i>ptch1</i>    | TTATTTGTCTGCCTGGGTGAG  | TGCATATTCGATGGGCTCAG   |
